# Supplementary material for: Re-Orienting Nurturing Care for Early Childhood Development During the COVID-19 Pandemic in Kenya: A Review
Source: Preprints.org preprint supplement (doi:10.20944/preprints202009.0056.v1), 2020-09-03
Supplement: Supplementary file 1 [file supplementary]

Figure 1: Authors’ conceptualization of the impacts of COVID-19 on nurturing care
